# Supplementary material for: Breast cancer detection accuracy of AI in an entire screening population: a retrospective, multicentre study
Source: PubMed Central journal article supplement (PMC10731688; doi:10.1186/s40644-023-00643-x), 2023-12-20
Supplement: 40644_2023_643_MOESM1_ESM.pdf [file 40644_2023_643_MOESM1_ESM.pdf]

## Supplementary Appendix materials for

### Breast cancer detection accuracy of AI in an entire screening population: a retrospective, multicentre study

Mohammad Talal Elhakim, MD<sup>1,2</sup>; Sarah Wordenskjold Stougaard MSc<sup>2</sup>; Ole Graumann, PhD<sup>1,3,4</sup>; Mads Nielsen, PhD<sup>5</sup>; Kristina Lång, PhD<sup>6,7</sup>; Oke Gerke, PhD<sup>2,8</sup>; Lisbet Brønros Larsen, MD<sup>1</sup>; Benjamin Schnack Brandt Rasmussen, PhD<sup>1,2,9</sup>

<sup>1</sup> Department of Radiology, Odense University Hospital, Klørvænget 47, Entrance 27, Ground floor, 5000 Odense C, Denmark

<sup>2</sup> Department of Clinical Research, University of Southern Denmark, Klørvænget 10, Entrance 112, 2nd floor, 5000 Odense C, Denmark

<sup>3</sup> Department of Radiology, Aarhus University Hospital, Palle Juul-Jensens Blvd. 99, 8200 Aarhus N, Denmark

<sup>4</sup> Department of Clinical Research, Aarhus University, Palle Juul-Jensens Blvd. 99, 8200 Aarhus N, Denmark

<sup>5</sup> Department of Computer Science, University of Copenhagen, Universitetsparken 1, 2100 København Ø, Denmark

<sup>6</sup> Department of Translational Medicine, Lund University, Inga Maria Nilssons gata 47, SE-20502, Malmö, Sweden

<sup>7</sup> Unilabs Mammography Unit, Skåne University Hospital, Jan Waldenströms gata 22, SE-20502, Malmö, Sweden

<sup>8</sup> Department of Nuclear Medicine, Odense University Hospital, Klørvænget 47, Entrance 44, 5000 Odense C, Denmark

<sup>9</sup> CAI-X – Centre for Clinical Artificial Intelligence, Odense University Hospital, Klørvænget 8C, Entrance 102, 5000 Odense C, Denmark

#### Corresponding author:

Name: Mohammad Talal Elhakim, MD

Address: Klørvænget 10, Entrance 112, 2nd floor, 5000 Odense C, Denmark

Email: mte@rsyd.dk

#### Contents

|                                                                                                                                                                 |     |
|-----------------------------------------------------------------------------------------------------------------------------------------------------------------|-----|
| <b>Supplementary eMethod 1.</b> Standard for Reporting of Diagnostic Accuracy Studies (STARD) checklist                                                         | p 2 |
| <b>Supplementary eFigure 1.</b> Distribution of Transpara exam scores across the study sample                                                                   | p 3 |
| <b>Supplementary eTable 1.</b> Detection accuracy analysis across radiologist position                                                                          | p 4 |
| <b>Supplementary eTable 2.</b> Detection agreements and discrepancies across cancer subgroups in the Standalone AI scenario                                     | p 5 |
| <b>Supplementary eTable 3.</b> Detection agreements and discrepancies across cancer subgroups in the AI-integrated screening scenario                           | p 6 |
| <b>Supplementary eTable 4.</b> Comparison of screening outcome and results of the reference standard in both study scenarios with descriptive workload analysis | p 7 |
| <b>Supplementary eTable 5.</b> Detection accuracy analysis with inclusion of next-round screen-detected cancers and long-term cancers in both study scenarios   | p 8 |

## Supplementary eMethod 1: Standard for Reporting of Diagnostic Accuracy Studies (STARD) checklist

| Section & Topic          | No  | Item                                                                                                                                                   | Reported on page #<br>(submitted version) |
|--------------------------|-----|--------------------------------------------------------------------------------------------------------------------------------------------------------|-------------------------------------------|
| <b>TITLE OR ABSTRACT</b> |     |                                                                                                                                                        |                                           |
|                          | 1   | Identification as a study of diagnostic accuracy using at least one measure of accuracy (such as sensitivity, specificity, predictive values, or AUC)  | 1-2                                       |
| <b>ABSTRACT</b>          |     |                                                                                                                                                        |                                           |
|                          | 2   | Structured summary of study design, methods, results, and conclusions (for specific guidance, see STARD for Abstracts)                                 | 2                                         |
| <b>INTRODUCTION</b>      |     |                                                                                                                                                        |                                           |
|                          | 3   | Scientific and clinical background, including the intended use and clinical role of the index test                                                     | 3                                         |
|                          | 4   | Study objectives and hypotheses                                                                                                                        | 3                                         |
| <b>METHODS</b>           |     |                                                                                                                                                        |                                           |
| <i>Study design</i>      | 5   | Whether data collection was planned before the index test and reference standard were performed (prospective study) or after (retrospective study)     | 4                                         |
| <i>Participants</i>      | 6   | Eligibility criteria                                                                                                                                   | 4                                         |
|                          | 7   | On what basis potentially eligible participants were identified (such as symptoms, results from previous tests, inclusion in registry)                 | 4                                         |
|                          | 8   | Where and when potentially eligible participants were identified (setting, location and dates)                                                         | 4                                         |
|                          | 9   | Whether participants formed a consecutive, random or convenience series                                                                                | 4                                         |
| <i>Test methods</i>      | 10a | Index test, in sufficient detail to allow replication                                                                                                  | 5-6                                       |
|                          | 10b | Reference standard, in sufficient detail to allow replication                                                                                          | 5-6                                       |
|                          | 11  | Rationale for choosing the reference standard (if alternatives exist)                                                                                  | 5-6                                       |
|                          | 12a | Definition of and rationale for test positivity cut-offs or result categories of the index test, distinguishing pre-specified from exploratory         | 5-6                                       |
|                          | 12b | Definition of and rationale for test positivity cut-offs or result categories of the reference standard, distinguishing pre-specified from exploratory | 4-6                                       |
|                          | 13a | Whether clinical information and reference standard results were available to the performers/readers of the index test                                 | -                                         |
|                          | 13b | Whether clinical information and index test results were available to the assessors of the reference standard                                          | -                                         |
| <i>Analysis</i>          | 14  | Methods for estimating or comparing measures of diagnostic accuracy                                                                                    | 6-7                                       |
|                          | 15  | How indeterminate index test or reference standard results were handled                                                                                | 4                                         |
|                          | 16  | How missing data on the index test and reference standard were handled                                                                                 | 4                                         |
|                          | 17  | Any analyses of variability in diagnostic accuracy, distinguishing pre-specified from exploratory                                                      | 6-7                                       |
|                          | 18  | Intended sample size and how it was determined                                                                                                         | -                                         |
| <b>RESULTS</b>           |     |                                                                                                                                                        |                                           |
| <i>Participants</i>      | 19  | Flow of participants, using a diagram                                                                                                                  | 8, Figure 2                               |
|                          | 20  | Baseline demographic and clinical characteristics of participants                                                                                      | 8, Table 1                                |
|                          | 21a | Distribution of severity of disease in those with the target condition                                                                                 | 8, Tables 1,3,4                           |
|                          | 21b | Distribution of alternative diagnoses in those without the target condition                                                                            | -                                         |
|                          | 22  | Time interval and any clinical interventions between index test and reference standard                                                                 | -                                         |
| <i>Test results</i>      | 23  | Cross tabulation of the index test results (or their distribution) by the results of the reference standard                                            | 9, eTable 4                               |
|                          | 24  | Estimates of diagnostic accuracy and their precision (such as 95% confidence intervals)                                                                | 9, Table 2, eTable 5                      |
|                          | 25  | Any adverse events from performing the index test or the reference standard                                                                            | -                                         |
| <b>DISCUSSION</b>        |     |                                                                                                                                                        |                                           |
|                          | 26  | Study limitations, including sources of potential bias, statistical uncertainty, and generalisability                                                  | 16-18                                     |
|                          | 27  | Implications for practice, including the intended use and clinical role of the index test                                                              | 15-18                                     |
| <b>OTHER INFORMATION</b> |     |                                                                                                                                                        |                                           |
|                          | 28  | Registration number and name of registry                                                                                                               | 4,19                                      |
|                          | 29  | Where the full study protocol can be accessed                                                                                                          | -                                         |
|                          | 30  | Sources of funding and other support; role of funders                                                                                                  | 20                                        |

**Supplementary eFigure 1: Distribution of Transpara exam scores across the study sample**

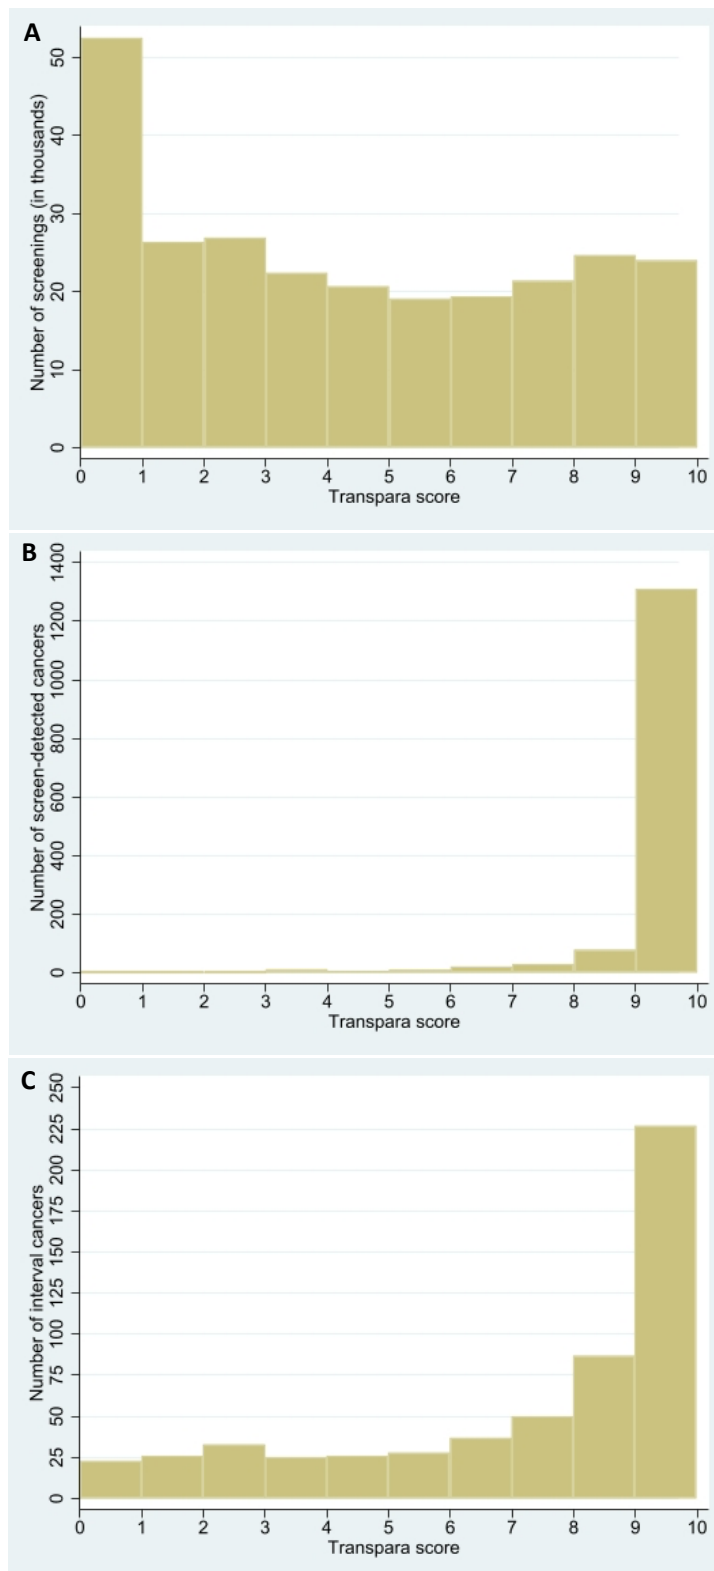

(A) The Transpara exam score distributed across (A) all screening mammograms, (B) screen-detected cancers, and (C) interval cancers in the study sample. The Transpara exam score was precalibrated in such a way that the number of screening mammograms in each category should be almost equal, i.e., 10% of the mammograms would fall into each category of scores. When matching the AI score thresholds in the study to the mean sensitivity and mean specificity of the first reader,  $AI_{sens}$  and  $AI_{spec}$  used a Transpara exam score of 9.56858 and 9.70159, respectively.

**Supplementary eTable 1: Detection accuracy analysis across radiologist position**

|                  | <b>Sensitivity<br/>(95% CI); p value*</b> | <b>Specificity<br/>(95% CI); p value*</b> | <b>PPV<br/>(95% CI); p value†</b> | <b>NPV<br/>(95% CI); p value†</b> | <b>Recall rate<br/>(95% CI); p value†</b> |
|------------------|-------------------------------------------|-------------------------------------------|-----------------------------------|-----------------------------------|-------------------------------------------|
| First reader     | 63.7 (61.6-65.8); ref.                    | 97.8 (97.7-97.8); ref.                    | 18.7 (17.8-19.6); ref.            | 99.7 (99.7-99.7); ref.            | 2.7 (2.6-2.8); ref.                       |
| Second reader    | 68.3 (66.2-70.3); <0.0001                 | 98.0 (98.0-98.1); <0.0001                 | 21.7 (20.7-22.7); <0.0001         | 99.7 (99.7-99.8); 0.004           | 2.5 (2.4-2.6); <0.0001                    |
| Arbitrator       | 90.8 (87.5-93.5); <0.0001                 | 53.0 (51.8-54.1); <0.0001                 | 9.7 (8.7-10.7); <0.0001           | 99.0 (98.7-99.7); <0.0001         | 49.3 (48.2-50.5); <0.0001                 |
| Combined reading | 73.9 (72.0-75.8); <0.0001                 | 97.9 (97.9-98.0); <0.0001                 | 22.0 (21.0-23.0); <0.0001         | 99.8 (99.8-99.8); <0.0001         | 2.7 (2.6-2.7); 0.18                       |

Data are % (95% CI); p value. PPV=positive predictive value. NPV=negative predictive value. \*p values were calculated using McNemar's test. †p values were calculated using exact binomial test.

**Supplementary eTable 2: Detection agreements and discrepancies across cancer subgroups in the Standalone AI scenario**

|                                         | Detected by both First reader and |                               | Detected by First reader, missed by |                               | Missed by First reader, detected by |                               | Missed by both First reader and |                               |
|-----------------------------------------|-----------------------------------|-------------------------------|-------------------------------------|-------------------------------|-------------------------------------|-------------------------------|---------------------------------|-------------------------------|
|                                         | Standalone AI <sub>sens</sub>     | Standalone AI <sub>spec</sub> | Standalone AI <sub>sens</sub>       | Standalone AI <sub>spec</sub> | Standalone AI <sub>sens</sub>       | Standalone AI <sub>spec</sub> | Standalone AI <sub>sens</sub>   | Standalone AI <sub>spec</sub> |
| <b>All cancers (n=2041)</b>             | 1043 (51.1)                       | 981 (48.1)                    | 258 (12.6)                          | 320 (15.7)                    | 258 (12.6)                          | 216 (10.6)                    | 482 (23.6)                      | 254 (25.7)                    |
| <b>Screen-detected cancers (n=1479)</b> | 1018 (68.8)                       | 961 (65.0)                    | 244 (16.5)                          | 301 (20.4)                    | 144 (9.7)                           | 127 (8.6)                     | 73 (4.9)                        | 90 (6.1)                      |
| <b>Interval cancers (n=562)</b>         | 25 (4.4)                          | 20 (3.6)                      | 14 (2.5)                            | 19 (3.4)                      | 114 (20.3)                          | 89 (15.8)                     | 409 (72.8)                      | 434 (77.2)                    |
| <12 months after screening (n=170)      | 7 (4.1)                           | 6 (3.5)                       | 6 (3.5)                             | 7 (4.1)                       | 36 (21.2)                           | 30 (17.6)                     | 121 (71.2)                      | 127 (74.7)                    |
| ≥12 months after screening (n=392)      | 18 (4.6)                          | 14 (3.6)                      | 8 (2.0)                             | 12 (3.1)                      | 78 (19.9)                           | 59 (15.1)                     | 288 (73.5)                      | 307 (78.3)                    |
| <b>Histological subtype</b>             |                                   |                               |                                     |                               |                                     |                               |                                 |                               |
| Invasive ductal (n=1393)                | 733 (52.6)                        | 689 (49.5)                    | 172 (12.3)                          | 216 (15.5)                    | 174 (12.5)                          | 144 (10.3)                    | 314 (22.5)                      | 344 (24.7)                    |
| Invasive lobular (n=222)                | 93 (41.9)                         | 87 (39.2)                     | 24 (10.8)                           | 30 (13.5)                     | 35 (15.8)                           | 27 (12.2)                     | 70 (31.5)                       | 78 (35.1)                     |
| Other invasive (n=215)                  | 65 (30.2)                         | 60 (27.9)                     | 38 (17.7)                           | 43 (20.0)                     | 22 (10.2)                           | 19 (8.8)                      | 90 (41.9)                       | 93 (43.3)                     |
| Ductal carcinoma in situ (n=211)        | 152 (72.0)                        | 145 (68.7)                    | 24 (11.4)                           | 31 (14.7)                     | 27 (12.8)                           | 26 (12.3)                     | 8 (3.8)                         | 9 (4.3)                       |
| <b>Tumour size*</b>                     |                                   |                               |                                     |                               |                                     |                               |                                 |                               |
| 0-10 mm (n=577)                         | 302 (52.3)                        | 277 (48.0)                    | 97 (16.8)                           | 122 (21.1)                    | 77 (13.3)                           | 65 (11.3)                     | 101 (17.5)                      | 113 (19.6)                    |
| 11-20 mm (n=790)                        | 431 (54.6)                        | 409 (51.8)                    | 90 (11.4)                           | 112 (14.2)                    | 82 (10.4)                           | 66 (8.4)                      | 187 (23.7)                      | 203 (25.7)                    |
| 21-50 mm (n=380)                        | 136 (35.8)                        | 129 (33.9)                    | 38 (10.0)                           | 45 (11.8)                     | 58 (15.3)                           | 48 (12.6)                     | 148 (38.9)                      | 158 (41.6)                    |
| 51+ mm (n=49)                           | 15 (30.6)                         | 15 (30.6)                     | 2 (4.1)                             | 2 (4.1)                       | 11 (22.4)                           | 8 (16.3)                      | 21 (42.9)                       | 24 (49.0)                     |
| Unknown (n=34)                          | 7 (20.6)                          | 6 (17.6)                      | 7 (20.6)                            | 8 (23.5)                      | 3 (8.8)                             | 3 (8.8)                       | 17 (50.0)                       | 17 (50.0)                     |
| <b>Malignancy grade*</b>                |                                   |                               |                                     |                               |                                     |                               |                                 |                               |
| Grade 1 (n=507)                         | 283 (55.8)                        | 263 (51.9)                    | 48 (9.5)                            | 68 (13.4)                     | 76 (15.0)                           | 61 (12.0)                     | 100 (19.7)                      | 115 (22.7)                    |
| Grade 2 (n=815)                         | 417 (51.2)                        | 395 (48.5)                    | 103 (12.6)                          | 125 (15.3)                    | 109 (13.4)                          | 92 (11.3)                     | 186 (22.8)                      | 203 (24.9)                    |
| Grade 3 (n=358)                         | 141 (39.4)                        | 131 (36.6)                    | 52 (14.5)                           | 62 (17.3)                     | 33 (9.2)                            | 26 (7.3)                      | 132 (36.9)                      | 139 (38.8)                    |
| Unknown (n=150)                         | 50 (33.3)                         | 47 (31.3)                     | 31 (20.7)                           | 34 (22.7)                     | 13 (8.7)                            | 11 (7.3)                      | 56 (37.3)                       | 58 (38.7)                     |
| <b>TNM stage*</b>                       |                                   |                               |                                     |                               |                                     |                               |                                 |                               |
| Local (I + II) (n=1761)                 | 876 (49.7)                        | 822 (46.7)                    | 229 (13.0)                          | 283 (16.1)                    | 224 (12.7)                          | 184 (10.4)                    | 432 (24.5)                      | 472 (26.8)                    |
| Locally advanced (III) (n=44)           | 10 (22.7)                         | 10 (22.7)                     | 5 (11.4)                            | 5 (11.4)                      | 4 (9.1)                             | 3 (6.8)                       | 25 (56.8)                       | 26 (59.1)                     |
| Distant metastasis (IV) (n=20)          | 4 (20.0)                          | 3 (15.0)                      | 0 (0.0)                             | 1 (5.0)                       | 3 (15.0)                            | 3 (15.0)                      | 13 (65.0)                       | 13 (65.0)                     |
| Unknown (n=5)                           | 1 (20.0)                          | 1 (20.0)                      | 0 (0.0)                             | 0 (0.0)                       | 0 (0.0)                             | 0 (0.0)                       | 4 (80.0)                        | 4 (80.0)                      |
| <b>Lymph node positivity*</b>           |                                   |                               |                                     |                               |                                     |                               |                                 |                               |
| No (n=1340)                             | 665 (49.6)                        | 624 (46.6)                    | 175 (13.1)                          | 216 (16.1)                    | 161 (12.0)                          | 135 (10.1)                    | 339 (25.3)                      | 365 (27.2)                    |
| Yes (n=490)                             | 226 (46.1)                        | 212 (43.3)                    | 59 (12.0)                           | 73 (14.9)                     | 70 (14.3)                           | 55 (11.2)                     | 135 (27.6)                      | 150 (30.6)                    |
| <b>ER positivity*</b>                   |                                   |                               |                                     |                               |                                     |                               |                                 |                               |
| 0% (n=207)                              | 62 (30.0)                         | 57 (27.5)                     | 34 (16.4)                           | 39 (18.8)                     | 13 (6.3)                            | 10 (4.8)                      | 98 (47.3)                       | 101 (48.8)                    |
| 1-9% (n=98)                             | 26 (26.5)                         | 22 (22.4)                     | 20 (20.4)                           | 24 (24.5)                     | 12 (12.2)                           | 11 (11.2)                     | 40 (40.8)                       | 41 (41.8)                     |
| 10-100% (n=1514)                        | 799 (52.8)                        | 753 (49.7)                    | 178 (11.8)                          | 224 (14.8)                    | 204 (13.5)                          | 167 (11.0)                    | 333 (22.0)                      | 370 (24.4)                    |
| Unknown (n=11)                          | 4 (36.4)                          | 4 (35.4)                      | 2 (18.2)                            | 2 (18.2)                      | 2 (18.2)                            | 2 (18.2)                      | 3 (27.3)                        | 3 (27.3)                      |
| <b>HER2 status*</b>                     |                                   |                               |                                     |                               |                                     |                               |                                 |                               |
| Negative (n=1581)                       | 782 (49.5)                        | 733 (46.4)                    | 210 (13.3)                          | 259 (16.4)                    | 204 (12.9)                          | 169 (10.7)                    | 385 (24.4)                      | 420 (26.6)                    |
| Positive (n=225)                        | 103 (45.8)                        | 97 (43.1)                     | 20 (8.9)                            | 26 (11.6)                     | 25 (11.1)                           | 19 (8.4)                      | 77 (34.2)                       | 83 (36.9)                     |
| Unknown (n=24)                          | 6 (25.0)                          | 5 (25.0)                      | 4 (16.7)                            | 4 (16.7)                      | 2 (8.3)                             | 2 (8.3)                       | 12 (50.0)                       | 12 (50.0)                     |

Data are n (%). The cancer detection rate is reported as the number of detected cancers out of the number of true cancers for the subgroup in the same row. TNM=tumour, node, metastasis. ER=estrogen receptor. HER2=human epidermal growth factor receptor 2. AI<sub>sens</sub>=artificial intelligence score cut-off point matched at mean first reader sensitivity. AI<sub>spec</sub>=artificial intelligence score cut-off point matched at mean first reader specificity. \*Reported for invasive cancers only.

**Supplementary eTable 3: Detection agreements and discrepancies across cancer subgroups in the AI-integrated screening scenario**

|                                         | Detected by both<br>Combined reading and |                               | Detected by Combined reading,<br>missed by |                               | Missed by Combined reading,<br>detected by |                               | Missed by both<br>Combined reading and |                               |
|-----------------------------------------|------------------------------------------|-------------------------------|--------------------------------------------|-------------------------------|--------------------------------------------|-------------------------------|----------------------------------------|-------------------------------|
|                                         | Integrated AI <sub>sens</sub>            | Integrated AI <sub>spec</sub> | Integrated AI <sub>sens</sub>              | Integrated AI <sub>spec</sub> | Integrated AI <sub>sens</sub>              | Integrated AI <sub>spec</sub> | Integrated AI <sub>sens</sub>          | Integrated AI <sub>spec</sub> |
| <b>All cancers (n=2041)</b>             | 1450 (71.0)                              | 1439 (70.5)                   | 59 (2.9)                                   | 70 (3.4)                      | 105 (5.1)                                  | 83 (4.1)                      | 427 (20.9)                             | 449 (22.0)                    |
| <b>Screen-detected cancers (n=1479)</b> | 1425 (96.3)                              | 1413 (95.5)                   | 54 (3.7)                                   | 66 (4.5)                      | 0 (0.0)                                    | 0 (0.0)                       | 0 (0.0)                                | 0 (0.0)                       |
| <b>Interval cancers (n=562)</b>         | 27 (4.8)                                 | 27 (4.8)                      | 3 (0.5)                                    | 3 (0.5)                       | 103 (18.3)                                 | 82 (14.6)                     | 429 (76.3)                             | 450 (80.1)                    |
| <12 months after screening (n=170)      | 13 (7.6)                                 | 13 (7.6)                      | 1 (0.6)                                    | 1 (0.6)                       | 34 (20.0)                                  | 28 (16.5)                     | 122 (71.8)                             | 128 (75.3)                    |
| ≥12 months after screening (n=392)      | 14 (3.6)                                 | 14 (3.6)                      | 2 (0.5)                                    | 2 (0.5)                       | 69 (17.6)                                  | 54 (13.8)                     | 307 (78.3)                             | 322 (82.1)                    |
| <b>Histological subtype</b>             |                                          |                               |                                            |                               |                                            |                               |                                        |                               |
| Invasive ductal (n=1393)                | 996 (71.5)                               | 990 (71.1)                    | 38 (2.7)                                   | 44 (3.2)                      | 76 (5.5)                                   | 63 (4.5)                      | 283 (20.3)                             | 296 (21.2)                    |
| Invasive lobular (n=222)                | 137 (61.7)                               | 134 (60.4)                    | 6 (2.7)                                    | 9 (4.1)                       | 17 (7.7)                                   | 11 (5.0)                      | 62 (27.9)                              | 68 (30.6)                     |
| Other invasive (n=215)                  | 110 (51.2)                               | 113 (52.6)                    | 11 (5.1)                                   | 8 (3.7)                       | 12 (5.6)                                   | 9 (4.2)                       | 82 (38.1)                              | 85 (39.5)                     |
| Ductal carcinoma in situ (n=211)        | 207 (98.1)                               | 202 (95.7)                    | 4 (1.9)                                    | 9 (4.3)                       | 0 (0.0)                                    | 0 (0.0)                       | 0 (0.0)                                | 0 (0.0)                       |
| <b>Tumour size*</b>                     |                                          |                               |                                            |                               |                                            |                               |                                        |                               |
| 0-10 mm (n=577)                         | 468 (81.1)                               | 469 (81.3)                    | 28 (4.9)                                   | 27 (4.7)                      | 16 (2.8)                                   | 13 (2.3)                      | 65 (11.3)                              | 68 (11.8)                     |
| 11-20 mm (n=790)                        | 560 (70.9)                               | 554 (70.1)                    | 21 (2.7)                                   | 27 (3.4)                      | 38 (4.8)                                   | 29 (3.7)                      | 171 (21.6)                             | 180 (22.8)                    |
| 21-50 mm (n=380)                        | 185 (48.7)                               | 183 (48.2)                    | 4 (1.1)                                    | 6 (1.6)                       | 41 (10.8)                                  | 33 (8.7)                      | 150 (39.5)                             | 158 (41.6)                    |
| 51+ mm (n=49)                           | 17 (34.7)                                | 17 (34.7)                     | 1 (2.0)                                    | 1 (2.0)                       | 7 (14.3)                                   | 5 (10.2)                      | 24 (49.0)                              | 26 (53.1)                     |
| Unknown (n=34)                          | 13 (38.2)                                | 14 (41.2)                     | 1 (2.9)                                    | 0 (0.0)                       | 3 (8.8)                                    | 3 (8.8)                       | 17 (50.0)                              | 17 (50.0)                     |
| <b>Malignancy grade*</b>                |                                          |                               |                                            |                               |                                            |                               |                                        |                               |
| Grade 1 (n=507)                         | 91 (60.7)                                | 94 (62.7)                     | 8 (5.3)                                    | 5 (3.3)                       | 5 (3.3)                                    | 3 (2.0)                       | 46 (30.7)                              | 48 (32.0)                     |
| Grade 2 (n=815)                         | 397 (78.3)                               | 391 (77.1)                    | 13 (2.6)                                   | 19 (3.7)                      | 21 (4.1)                                   | 19 (3.7)                      | 76 (15.0)                              | 78 (15.4)                     |
| Grade 3 (n=358)                         | 561 (68.8)                               | 560 (68.7)                    | 26 (3.2)                                   | 27 (3.3)                      | 56 (6.9)                                   | 45 (5.5)                      | 172 (21.1)                             | 183 (22.5)                    |
| Unknown (n=150)                         | 194 (54.2)                               | 192 (53.6)                    | 8 (2.2)                                    | 10 (2.8)                      | 23 (6.4)                                   | 16 (4.5)                      | 133 (37.2)                             | 140 (39.1)                    |
| <b>TNM stage*</b>                       |                                          |                               |                                            |                               |                                            |                               |                                        |                               |
| Local (I + II) (n=1761)                 | 1226 (69.6)                              | 1219 (69.2)                   | 54 (3.1)                                   | 61 (3.5)                      | 98 (5.6)                                   | 77 (4.4)                      | 383 (21.7)                             | 404 (22.9)                    |
| Locally advanced (III) (n=44)           | 12 (27.3)                                | 13 (29.5)                     | 1 (2.3)                                    | 0 (0.0)                       | 4 (9.1)                                    | 3 (6.8)                       | 27 (61.4)                              | 28 (63.6)                     |
| Distant metastasis (IV) (n=20)          | 4 (20.0)                                 | 4 (20.0)                      | 0 (0.0)                                    | 0 (0.0)                       | 3 (15.0)                                   | 3 (15.0)                      | 13 (65.0)                              | 13 (65.0)                     |
| Unknown (n=5)                           | 1 (20.0)                                 | 1 (20.0)                      | 0 (0.0)                                    | 0 (0.0)                       | 0 (0.0)                                    | 0 (0.0)                       | 4 (80.0)                               | 4 (80.0)                      |
| <b>Lymph node positivity*</b>           |                                          |                               |                                            |                               |                                            |                               |                                        |                               |
| No (n=1340)                             | 942 (70.3)                               | 941 (70.2)                    | 42 (3.1)                                   | 43 (3.2)                      | 63 (4.7)                                   | 51 (3.8)                      | 293 (21.9)                             | 305 (22.8)                    |
| Yes (n=490)                             | 301 (61.4)                               | 296 (60.4)                    | 13 (2.7)                                   | 18 (3.7)                      | 42 (8.6)                                   | 32 (6.5)                      | 134 (27.3)                             | 144 (29.4)                    |
| <b>ER positivity*</b>                   |                                          |                               |                                            |                               |                                            |                               |                                        |                               |
| 0% (n=207)                              | 91 (44.0)                                | 94 (45.4)                     | 11 (5.3)                                   | 8 (3.9)                       | 9 (4.3)                                    | 7 (3.4)                       | 96 (46.4)                              | 98 (47.3)                     |
| 1-9% (n=98)                             | 48 (49.0)                                | 45 (45.9)                     | 1 (1.0)                                    | 4 (4.1)                       | 9 (9.2)                                    | 6 (6.1)                       | 40 (40.8)                              | 43 (43.9)                     |
| 10-100% (n=1514)                        | 1097 (72.5)                              | 1091 (72.1)                   | 43 (2.8)                                   | 49 (3.2)                      | 86 (5.7)                                   | 69 (4.6)                      | 288 (19.0)                             | 305 (20.1)                    |
| Unknown (n=11)                          | 7 (63.6)                                 | 7 (63.6)                      | 0 (0.0)                                    | 0 (0.0)                       | 1 (9.1)                                    | 1 (9.1)                       | 3 (27.3)                               | 3 (27.3)                      |
| <b>HER2 status*</b>                     |                                          |                               |                                            |                               |                                            |                               |                                        |                               |
| Negative (n=1581)                       | 1105 (69.9)                              | 1097 (69.4)                   | 46 (2.9)                                   | 54 (3.4)                      | 89 (5.6)                                   | 71 (4.5)                      | 341 (21.6)                             | 359 (22.7)                    |
| Positive (n=225)                        | 127 (56.4)                               | 129 (57.3)                    | 8 (3.6)                                    | 6 (2.7)                       | 15 (6.7)                                   | 11 (4.9)                      | 75 (33.3)                              | 79 (35.1)                     |
| Unknown (n=24)                          | 11 (45.8)                                | 11 (45.8)                     | 1 (4.2)                                    | 1 (4.2)                       | 1 (4.2)                                    | 1 (4.2)                       | 11 (45.8)                              | 11 (45.8)                     |

Data are n (%). The cancer detection rate is reported as the number of detected cancers out of the number of true cancers for the subgroup in the same row. TNM=tumour, node, metastasis. ER=estrogen receptor. HER2=human epidermal growth factor receptor 2. AI<sub>sens</sub>=artificial intelligence score cut-off point matched at mean first reader sensitivity. AI<sub>spec</sub>=artificial intelligence score cut-off point matched at mean first reader specificity. \*Reported for invasive cancers only.

**Supplementary eTable 4: Comparison of screening outcome and results of the reference standard in both study scenarios with descriptive workload analysis.**

|                           | Standalone AI |                               |                               | AI-integrated screening |                               |                               |
|---------------------------|---------------|-------------------------------|-------------------------------|-------------------------|-------------------------------|-------------------------------|
|                           | First reader  | Standalone AI <sub>sens</sub> | Standalone AI <sub>spec</sub> | Combined reading        | Integrated AI <sub>sens</sub> | Integrated AI <sub>spec</sub> |
| <b>Number of episodes</b> |               |                               |                               |                         |                               |                               |
| True positive             | 1301 (ref.)   | 1301 (0.0)                    | 1197 (-7.9)                   | 1509 (ref.)             | 1555 (+3.0)                   | 1522 (+0.9)                   |
| True negative             | 249959 (ref.) | 246590 (-1.3)                 | 249952 (<-0.1)                | 250278 (ref.)           | 248616 (-0.7)                 | 250234 (<-0.1)                |
| False positive            | 5671 (ref.)   | 9040 (+59.4)                  | 5678 (+0.1)                   | 5352 (ref.)             | 7014 (+31.1)                  | 5396 (+0.8)                   |
| False negative            | 740 (ref.)    | 740 (0.0)                     | 844 (+14.1)                   | 532 (ref.)              | 486 (-8.6)                    | 519 (-2.4)                    |
| <b>Workload</b>           |               |                               |                               |                         |                               |                               |
| Recalls                   | 6972 (ref.)   | 10341 (+48.3)                 | 6875 (-1.4)                   | 6861 (ref.)             | 8569 (+24.9)                  | 6918 (+0.8)                   |
| Human readings            | 257671 (ref.) | 0 (-100)                      | 0 (-100)                      | 522105 (ref.)           | 270936 (-48.1)                | 267946 (-48.7)                |
| Arbitrations              | NA            | NA                            | NA                            | 7434 (ref.)             | 13265 (+74.4)                 | 10275 (+38.2)                 |

Data are n ( $\Delta\%$ ). AI<sub>sens</sub>=artificial intelligence score cut-off point matched at mean first reader sensitivity. AI<sub>spec</sub>=artificial intelligence score cut-off point matched at mean first reader specificity.

**Supplementary eTable 5: Detection accuracy analysis with inclusion of next-round screen-detected cancers and long-term cancers in both study scenarios**

|                                | <b>Sensitivity<br/>(95% CI); p value*</b> | <b>Specificity<br/>(95% CI); p value*</b> | <b>PPV<br/>(95% CI); p value†</b> | <b>NPV<br/>(95% CI); p value†</b> |
|--------------------------------|-------------------------------------------|-------------------------------------------|-----------------------------------|-----------------------------------|
| <b>Standalone AI</b>           |                                           |                                           |                                   |                                   |
| First reader                   | 30.5 (29.2-31.8); ref.                    | 97.8 (97.7-97.9); ref.                    | 20.2 (19.3-21.2); ref.            | 98.7 (98.7-98.8); ref.            |
| Standalone AI <sub>sens</sub>  | 37.7 (36.2-39.2); <0.0001                 | 96.6 (96.5-96.7); <0.0001                 | 16.9 (16.1-17.7); <0.0001         | 98.8 (98.8-98.9); <0.0001         |
| Standalone AI <sub>spec</sub>  | 33.3 (31.8-34.7); <0.0001                 | 97.9 (97.8-98.0); 0.03                    | 22.4 (21.3-23.4); <0.0001         | 98.8 (98.7-98.8); 0.02            |
| <b>AI-integrated screening</b> |                                           |                                           |                                   |                                   |
| Combined reading               | 34.5 (33.2-35.8); ref.                    | 97.9 (97.9-98.0); ref.                    | 23.2 (22.2-24.3); ref.            | 98.8 (98.7-98.8); ref.            |
| Integrated AI <sub>sens</sub>  | 39.1 (37.7-40.6); <0.0001                 | 97.3 (97.3-97.4); <0.0001                 | 21.1 (20.2-22.0); <0.0001         | 98.9 (98.8-98.9); 0.0004          |
| Integrated AI <sub>spec</sub>  | 37.3 (35.9-38.7); <0.0001                 | 97.9 (97.9-98.0); 0.28                    | 24.9 (23.9-26.0); 0.001           | 98.8 (98.8-98.9); 0.02            |

Data are % (95% CI); p value. Next-round screen-detected cancers (n=1232) and long-term cancers (n=2372) include ductal carcinoma in situ. Linear regression with the measure of performance was used to take the correlation between women and possible multiple cancers into account. PPV=positive predictive value. NPV=negative predictive value. AI<sub>sens</sub>=artificial intelligence score cut-off point matched at mean first reader sensitivity from the primary analysis presented in study table 2. AI<sub>spec</sub>=artificial intelligence score cut-off point matched at mean first reader specificity from the primary analysis presented in study table 2. \*p values were calculated using McNemar's test. †p values were calculated using exact binomial test.
